# Supplementary material for: Biosynthetic pathways to isocyanides and isothiocyanates; precursor incorporation studies on terpene metabolites in the tropical marine sponges Amphimedon terpenensis and Axinyssa n.sp.
Source: Royal Society of Chemistry journal article supplement (doi:10.1039/b315894b), 2004-01-01

Biosynthetic Pathways to Isocyanides and Isothiocyanates; Precursor Incorporation  
Studies on Terpene Metabolites in the Tropical Marine Sponges *Amphimedon terpenensis*  
and *Axinyssa* n.sp.

Jamie S. Simpson, and Mary J. Garson

## Supplementary data

### Table of Contents

|                                                                                |    |
|--------------------------------------------------------------------------------|----|
| <b>Figure S1.</b> $^1\text{H}$ NMR spectrum for formamide <b>14</b>            | S2 |
| <b>Figure S2.</b> $^{13}\text{C}$ NMR spectrum for formamide <b>14</b>         | S2 |
| <b>Figure S3.</b> $^1\text{H}$ NMR spectrum for thiourea <b>15</b>             | S3 |
| <b>Figure S4.</b> $^{13}\text{C}$ NMR spectrum for thiourea <b>15</b>          | S3 |
| <b>Figure S5.</b> $^1\text{H}$ NMR spectrum for thiol <b>16</b>                | S4 |
| <b>Figure S6.</b> $^{13}\text{C}$ NMR spectrum for thiol <b>16</b>             | S4 |
| <b>Figure S7.</b> $^1\text{H}$ NMR spectrum for bisisothiocyanate <b>17</b>    | S5 |
| <b>Figure S8.</b> $^{13}\text{C}$ NMR spectrum for bisisothiocyanate <b>17</b> | S5 |
| <b>Figure S9.</b> $^1\text{H}$ NMR spectrum spectra for amine <b>18</b>        | S6 |
| <b>Figure S10.</b> $^{13}\text{C}$ NMR spectrum for amine <b>18</b>            | S6 |

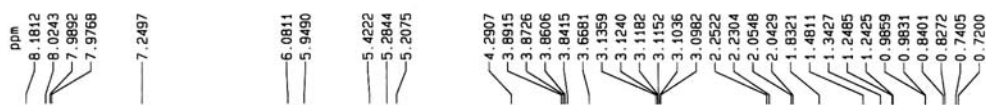

**Figure S1.** <sup>1</sup>H NMR spectrum for formamide **14**

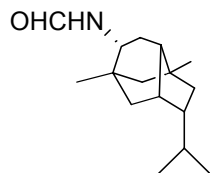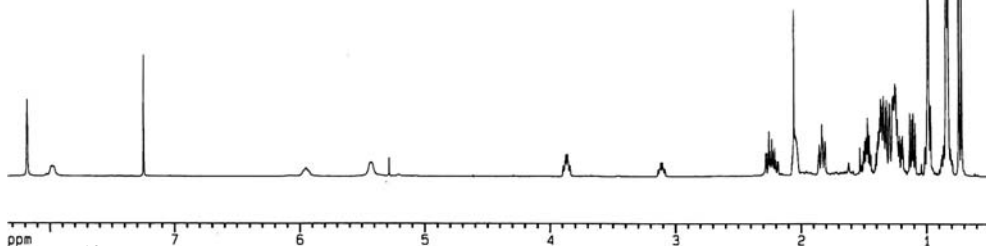

**Figure S2.** <sup>13</sup>C NMR spectrum for formamide **14**

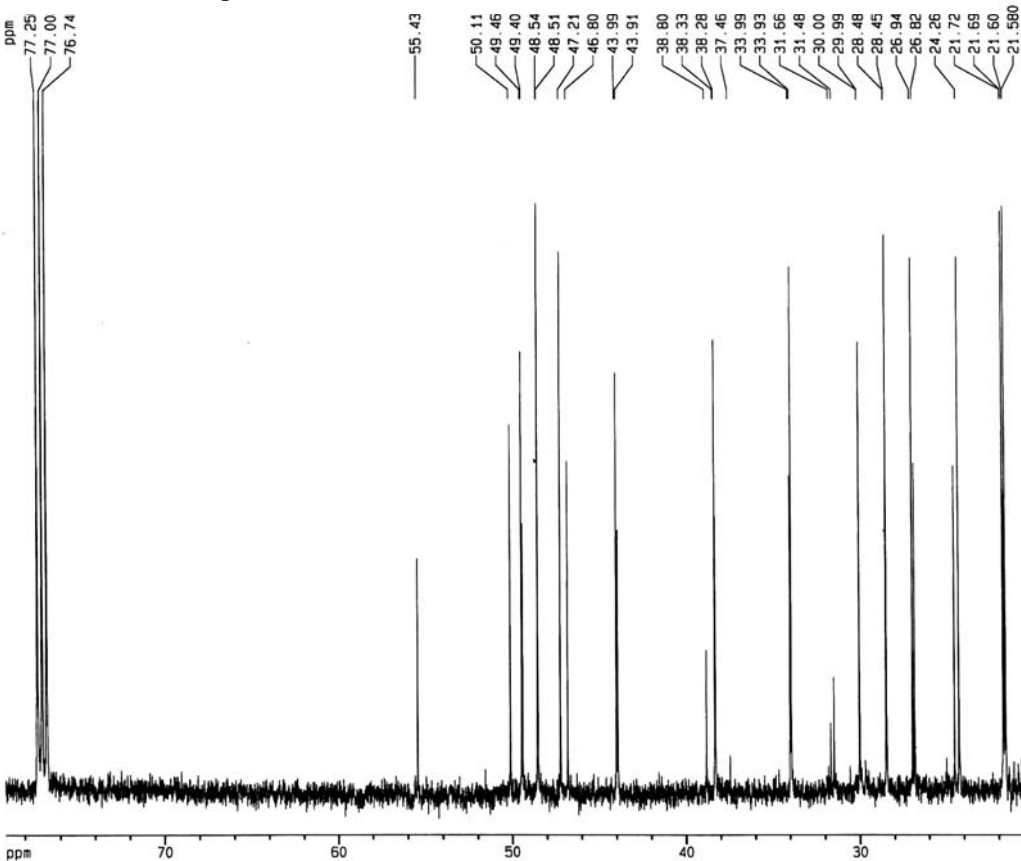

**Figure S3.**  $^1\text{H}$  NMR spectrum for thiourea **15**

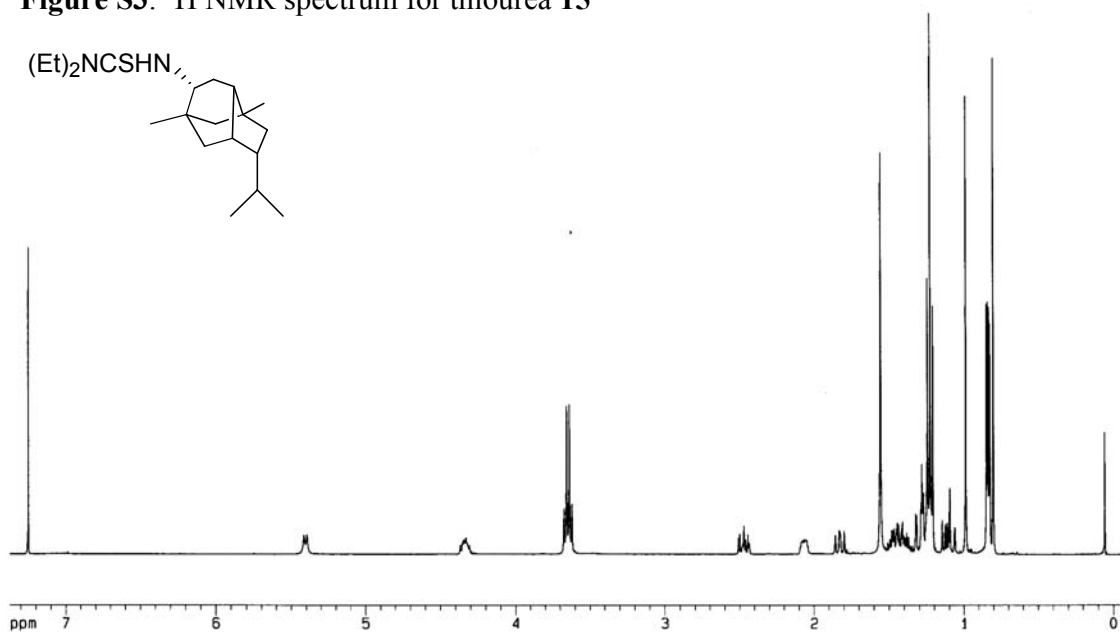

**Figure S4.**  $^{13}\text{C}$  NMR spectrum for thiourea **15**

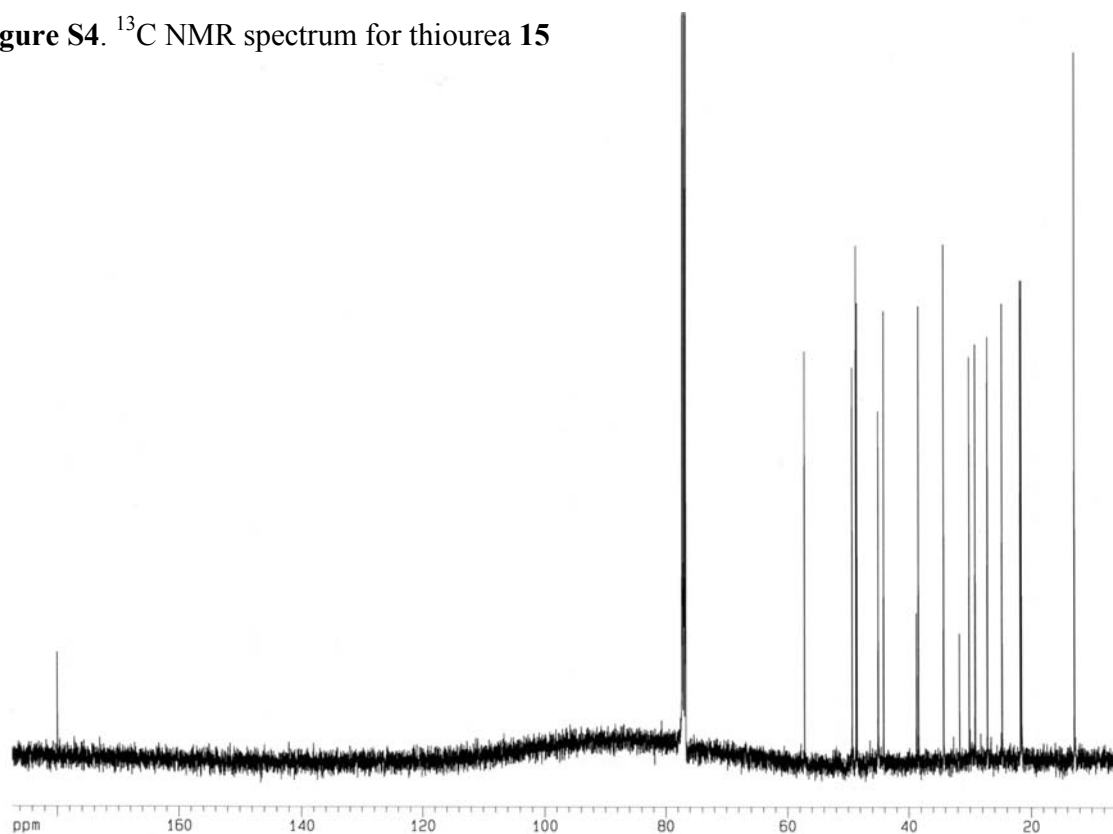

Supplementary Material for Organic & Biomolecular Chemistry

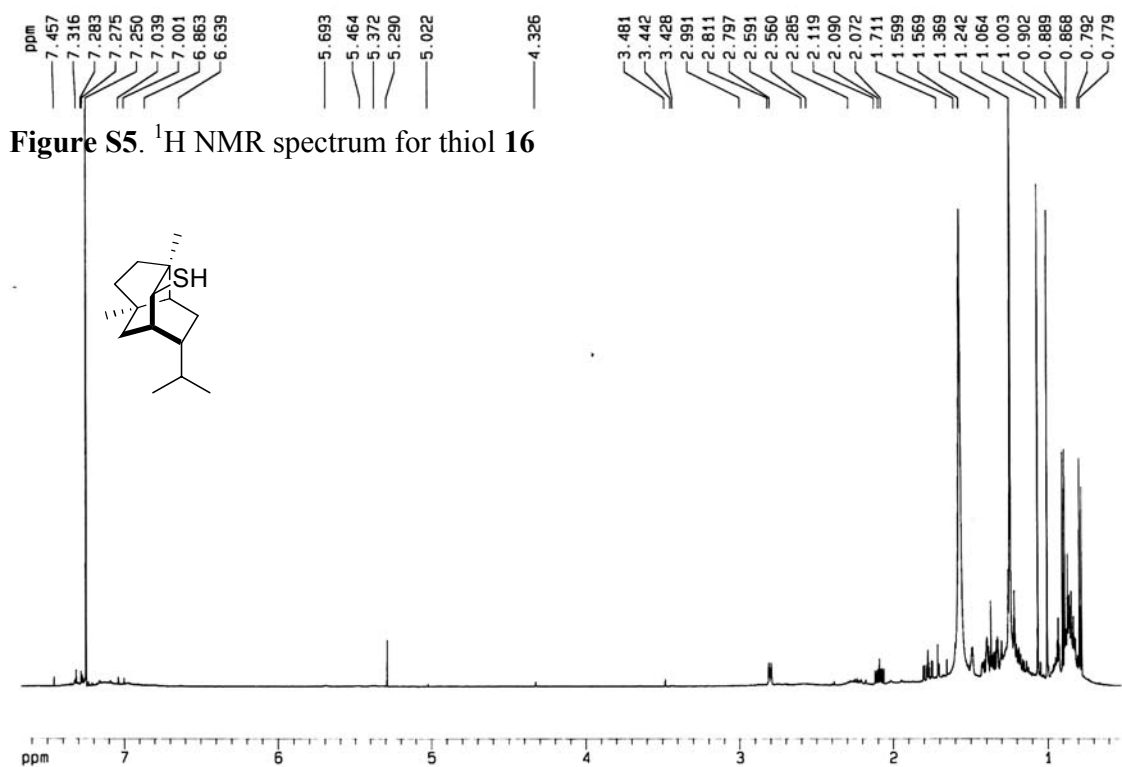

**Figure S6.**  $^{13}\text{C}$  NMR spectrum for thiol **16**

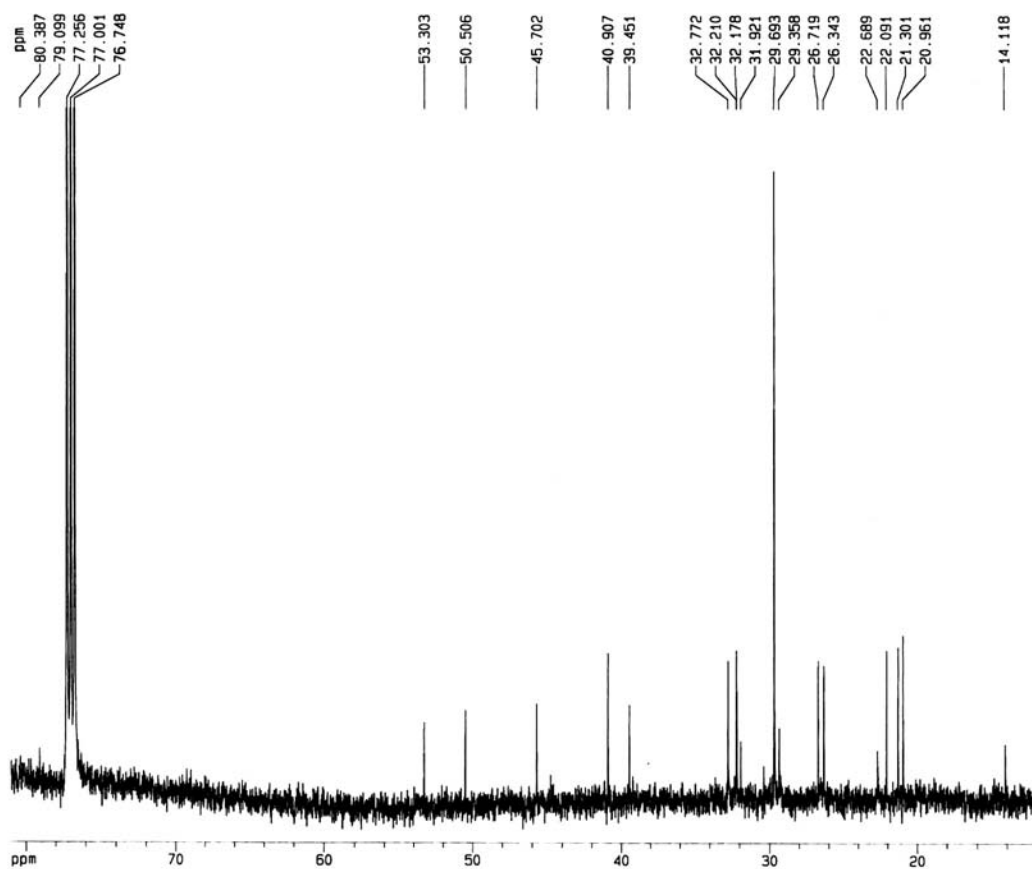

**Figure S7.**  $^1\text{H}$  NMR spectrum for bisisothiocyanate **17**

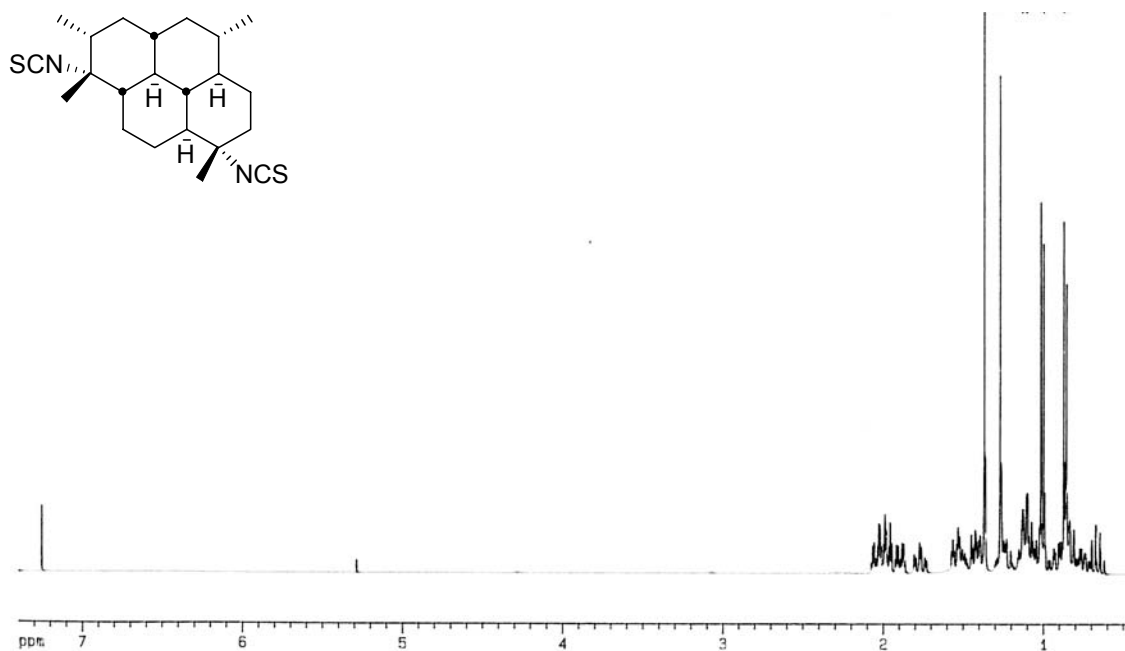

**Figure S8.**  $^{13}\text{C}$  NMR spectrum for bisisothiocyanate **17**

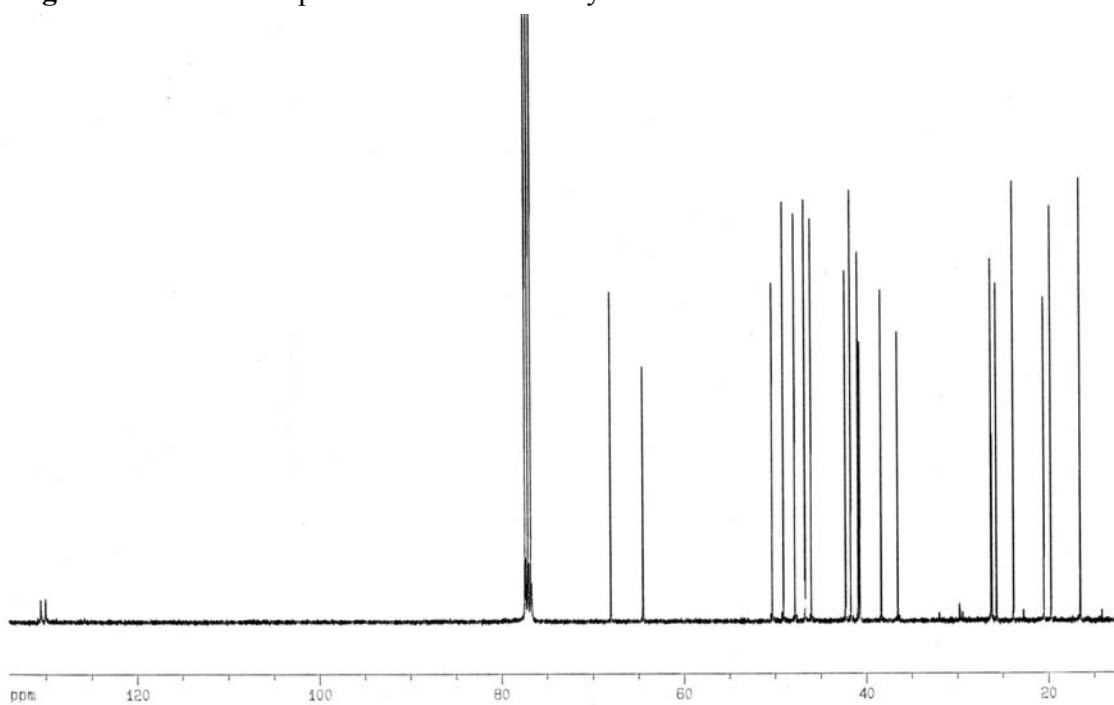

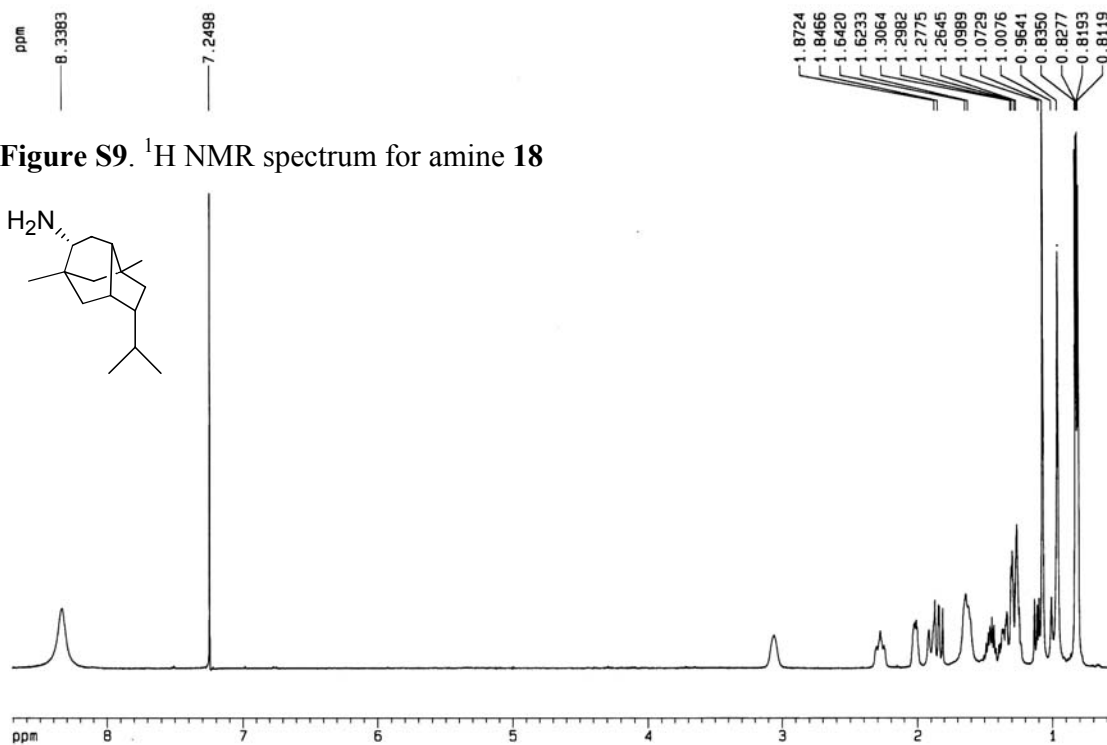

**Figure S9.**  $^{13}\text{C}$  NMR spectrum for amine **18**

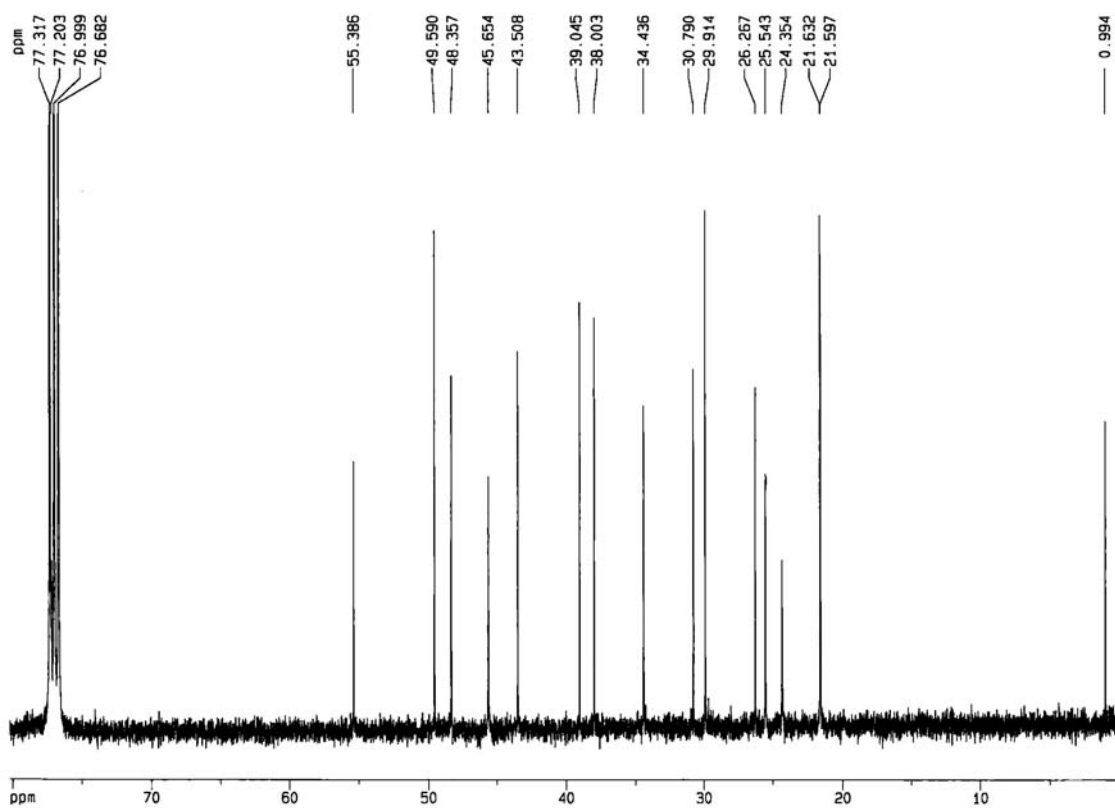

Supplement: b315894b.pdf [file b315894b.pdf]
